# Supplementary material for: Assessing the Life Science Knowledge of Students and Teachers Represented by the K–8 National Science Standards
Source: Atypon-hosted journal article supplement (doi:10.1187/cbe.12-06-0078), 2013-09-01
Supplement: combinedsupmats1.pdf [file combinedsupmats1.pdf]

# Supplemental Material

*CBE—Life Sciences Education*  
**Sadler et al.**

## Supplemental Material References:

Anderson DL, Fisher KM, Norman JG (2002). Development and validation of the conceptual inventory of natural selection. *Journal of Research in Science Teaching* 39, 952-978.

Bardapurkar AS (2008). Do students see the “selection” in organic evolution? A critical review of the causal structure of student explanations. *Evolution: Education and Outreach* 1, 299-305.

Barman CR, Mayer, DA (1994). An analysis of high school students' concepts and textbook presentations of food chains and food webs. *The American Biology Teacher* 56, 160-163.

Bell B, Freyberg, P (1985). Language in the science classroom. In: *Learning in Science*, ed. R. Osborne and P. Freyberg, Auckland, NZ: Heinemann, 29-40.

Berthelsen B (1999). Students naïve conceptions in life science. *Mich Sci Teach Assoc J* 44, 13-19.

Bhattacharjee Y (2009). Eugenie Scott toils in defense of evolution. *Science* 324, 1250-1251.

Bishop B, Anderson C (1990). Student conceptions of natural selection and its role in evolution. *Journal of Research in Science Teaching* 27, 415-427.

Brown E (2009). When insiders become outsiders: parental objections to public school sex education programs. *Duke Law Journal* 59, 109-144.

Brumby MN (1982). Students' perceptions of the concept of life. *Science Education* 66, 613-622.

Carey S (1985). *Conceptual Change in Childhood*, Cambridge, MA: MIT Press.

Cho HH, Kahle JB, Nordland FH (1985). An investigation of high school biology textbooks as sources of misconceptions and difficulties in genetics and some suggestions for teaching genetics. *Science Education* 69, 707-719.

Clough E, Driver R (1986). A study of consistency in the use of students' conceptual frameworks across different task contexts. *Science Education* 70, 473-496.

Clough EE, Wood-Robinson C (1985). Children's understanding of inheritance. *Journal of Biological Education* 19, 304-310.

D'Avanzo C. (2008). Biology concept inventories: overview, status, and next steps. *BioScience* 58, 1079-1085.

Deadman JA, Kelly PJ (1978). What do secondary school boys understand about evolution and heredity before they are taught the topics? *Journal of Biological Education* 12, 7-15.

diSessa AA (1993). Toward an epistemology of physics. *Cognition and Instruction* 10, 105-225.

Driver R, Squires A, Rushworth P, Wood-Robinson V (1994). *Making Sense of Secondary Science: Research into Children's Ideas*, London: Routledge.

Fries-Gaither J (2009). *Common Misconceptions about Biomes and Ecosystems, Beyond Penguins and Polar Bears*.

<http://beyondpenguins.ehe.osu.edu/issue/tundra-life-in-the-polar-extremes/common-misconceptions-about-biomes-and-ecosystems> (accessed 19 February 2013)

Gott R, Davey P, Gamble N, Head J, Khaligh Y, Murphy P, Orgee A, Schofield B, Welford R (1985). *Science in Schools Ages 13 and 15: Report No 3*. DES: London.

Griffiths AK, Grant, BAC (1985). High school students' understanding of food webs: identification of learning hierarchy and related misconceptions. *Journal of*

Research in Science Teaching 22, 421-436.

Hogan K (2000). Assessing students' system reasoning in ecology. *Journal of Biological Education* 35, 22-28.

Inagaki K (1989). Developmental shift in biological inference processes: from similarity-based to category-based attribution. *Human Development* 32, 79-87.

Inagaki K, Hatano G (1987). Young children's spontaneous personification as analogy. *Child Development* 58, 1013-1020.

Jungwirth E (1975). Preconceived adaptation and inverted evolution (a case study of distorted concept formation in high school biology). *Australian Science Teacher Journal* 21, 95-100.

Kargbo DB, Hobbs ED, Erikson GL (1980). Children's belief and inherited characteristics. *Journal of Biological Education* 14, 137-146.

Klymkowsky M, Garvin-Doxas K, Zeilik, M (2003). Bioliteracy and teaching efficacy: What biologists can learn from physicists. *Cell Biology Education* 2, 155-161.

Kwen BH (2005). Teachers' misconceptions of biological science concepts as revealed in science examination papers. Paper presented at the AARE International Education Research Conference, held 27 November, in Singapore.

Lennon KA, DeBoer GE (2008). Probing middle school students' understanding of ideas about interdependence in living systems through content-aligned assessment. Paper presented at the NARST Annual International Conference, held 31 March, in Baltimore, MD.

Mayr E (1982). *The Growth of Biological Thought: Diversity, Evolution, and Inheritance*, Cambridge, MA: Harvard University Press.

McCloskey M (1983). Intuitive physics. *Scientific American* 248, 114-122.

Miller J, Scott E, Okamoto S (2006). Public acceptance of evolution. *Science* 313, 765-766.

Mintzes J, Arnaudin MW (1984). *Children's Biology: A Review of Research on Conceptual Development in the Life Sciences*, Washington, DC: U.S. Department of Education, Office of Educational Research and Improvement.

Moore O (1993). Learning to live, when the bird breaks from the cage. In: *Censored Books, Critical Viewpoints*, ed. NJ Karolides, L Burrell, and JM Kean, Metuchen, NJ: Scarecrow Press.

Munson BH (1991). Relationships between an individual's conceptual ecology and the individual's conceptions of ecology. PhD Dissertation, Minneapolis: University of Minnesota.

Munson BH (1994). Ecological misconceptions. *Journal of Environmental Education* 25, 30-34.

National Research Council (NRC) (1996). *National Science Education Standards*, Washington, DC: National Academy Press.

Ochiai M (1989). The role of knowledge in the development of the life concept. *Human Development* 32, 72-78.

Piaget J (1972). *The Psychology of the Child*, New York: Basic.

Ruse M, Travis J (2009). *Evolution: The First Four Billion Years*, Cambridge, MA: Harvard University Press.

Stavy R, Wax N (1989). Children's conceptions of plants as living things. *Human Development* 32, 88-94.

Stern L, Ben-Akiva I (2007). Tail's inheritance: challenging secondary school student's ideas about the inheritance of acquired traits. *The American Biology Teacher* 69, 76-79.

Strike KA, Posner GJ (1992). A revisionist theory of conceptual change. In: *Philosophy of Science, Cognitive Psychology, and Educational Theory and Practice*, ed. RA Duschl and RJ Hamilton, Albany: State University of New York Press, 147-176.

Strommen E (1995). Lions and tigers and bears, oh my! Children's conceptions on forests and their inhabitants. *Journal of Research in Science Teaching* 32, 683-689.

Sweetland R (2013). Home of Bob--Natural Science Misconceptions. [www.homeofbob.com/science/misconceptions/index.html](http://www.homeofbob.com/science/misconceptions/index.html) (accessed 19 February 2013).

Tamir P, Ben Peretz M (1988). High school biology in two countries. *The American Biology Teacher* 50, 91-96.

Tamir P, Gal-Chappin R, Nussnovitz R (1981). How do intermediate and junior high school students conceptualize living and non-living? *Journal of Research in Science Teaching* 18, 241-248.

Thijs GD, Berg E (1995). Cultural factors in the origin and remediation of alternative conceptions in physics. *Science and Education* 4, 317-347.

University of California Museum of Paleontology. Understanding Evolution for Teachers. <http://evolution.berkeley.edu/evosite/evohome.html> (accessed 19 February 2013).

Vygotsky L (1986). *Thought and Language*, Boston: MIT Press.

Wandersee JH (1986). Can the history of science help science educators anticipate students' misconceptions? *Journal of Research in Science Teaching* 23, 581-597.

Wandersee JH, Mintzes JJ, Novak JD (1994). Research on alternative conceptions in science. In: *Handbook of Research on Science Teaching and Learning*, ed. D Gabel, New York: MacMillan, 177-210.

Wilson CD, Zesaguli J, Anderson CW (2006). The Development of a K-12 Learning Progression for Diversity in Environmental Systems, [http://edr1.educ.msu.edu/EnvironmentalLit/publicsite/files/EstesParkMeeting/Diversity\\_LTER\\_Report.doc](http://edr1.educ.msu.edu/EnvironmentalLit/publicsite/files/EstesParkMeeting/Diversity_LTER_Report.doc) (accessed 19 February 2013).

Yip DY (1998). Identification of misconceptions in novice biology teachers and remedial strategies for improving biology learning. *International Journal of Science Education* 20, 461-477.
